# Supplementary material
Source: publisher site journal article supplement (https://www.dovepress.com/article/548402)
Supplement: Supplementary file 1 [file Supplementary_material_1_1_1.docx]

| Valor de la variable | Variable X | Variable Y | Rho | Spearman p-value | p_adj_FDR |
| --- | --- | --- | --- | --- | --- |
| min | BCVA (Dec) | Distance activities | 0,44664 | 0 | 0 |
| min | BCVA (Dec) | General Vision | 0,43989 | 0 | 0 |
| min | BCVA (Dec) | Total | 0,42438 | 0,00001 | 0,005026667 |
| mean | Size Guttae | Vision Mental Health | 0,53497 | 0,00005 | 0,009425 |
| mean | Diameter Guttae | Vision Mental Health | 0,53054 | 0,00006 | 0,010053333 |
| min | BCVA (Dec) | Near activities | 0,37542 | 0,00012 | 0,014002857 |
| min | BCVA (Dec) | Vision Role dificulties | 0,36246 | 0,00021 | 0,021112 |
| min | BCVA (Dec) | Vision Mental Health | 0,35578 | 0,00028 | 0,02639 |
| min | BCVA (Dec) | Peripheral vision | 0,30835 | 0,0019 | 0,12064 |
| mean | Phase Height | Ocular Pain | 0,42414 | 0,00192 | 0,12064 |
| min | Power Vector J₀ (D) | Distance activities | 0,30978 | 0,00225 | 0,13572 |
| sum | Cell Density (cell/mm²) | Ocular Pain | -0,29308 | 0,00308 | 0,172023704 |
| min | RMS Coma (µm) | Driving | -0,40215 | 0,00344 | 0,185268571 |
| min | Phase Height | General Health | 0,45527 | 0,00359 | 0,18668 |
| mean | Delaunay Triangulation Convex Hull | Vision Mental Health | -0,38886 | 0,0048 | 0,233496774 |
| min | BCVA (Dec) | Vision Social Functioning | 0,27775 | 0,00514 | 0,234882424 |
| min | RMS Coma (µm) | Total | -0,28336 | 0,00565 | 0,236672222 |
| max | Regions Detected | Vision Mental Health | 0,38318 | 0,00551 | 0,236672222 |
| max | Density Guttae | Vision Mental Health | 0,38318 | 0,00551 | 0,236672222 |
| max | Power Vector J₄₅ (D) | General Vision | -0,27225 | 0,00641 | 0,256756842 |
| mean | Delaunay Triangulation | Vision Mental Health | -0,37645 | 0,00647 | 0,256756842 |
| mean | Delaunay Triangulation Convex Hull | Ocular Pain | -0,36863 | 0,00777 | 0,284724762 |
| min | RMS Coma (µm) | Distance activities | -0,27319 | 0,00772 | 0,284724762 |
| min | Power Vector J₀ (D) | Peripheral vision | 0,26905 | 0,00874 | 0,306509767 |
| min | RMS Coma (µm) | Ocular Pain | -0,26581 | 0,00961 | 0,31504087 |
| max | Phase Height | Ocular Pain | 0,27223 | 0,00944 | 0,31504087 |
| min | RMS Astigmatism (µm) | Distance activities | -0,26634 | 0,00946 | 0,31504087 |
| min | Power Vector J₀ (D) | Total | 0,25866 | 0,01138 | 0,317209123 |
| min | BCVA (Dec) | Vision Dependency | 0,25662 | 0,00996 | 0,317209123 |
| mean | Delaunay Triangulation Convex Hull | Total | -0,34837 | 0,01224 | 0,31824 |
| max | Delaunay Triangulation | Ocular Pain | -0,34748 | 0,01248 | 0,318980339 |
| mean | Power Vector J₄₅ (D) | Vision Dependency | -0,24307 | 0,01534 | 0,333246761 |
| sum | Power Vector J₀ (D) | Vision Dependency | 0,24163 | 0,01544 | 0,333246761 |
| min | RMS Coma (µm) | Near activities | -0,25031 | 0,01496 | 0,333246761 |
| mean | Delaunay Triangulation | Total | -0,34284 | 0,01378 | 0,333246761 |
| min | Delaunay Triangulation | Vision Mental Health | -0,29008 | 0,01726 | 0,351730811 |
| min | Cell Density (cell/mm²) | General Health | -0,37975 | 0,0171 | 0,351730811 |
| mean | Density Guttae (accounts/mm2) | Vision Mental Health | 0,24947 | 0,01773 | 0,351800526 |
| mean | Regions Detected (px2) | Vision Mental Health | 0,24947 | 0,01773 | 0,351800526 |
| max | Delaunay Triangulation Convex Hull | Near activities | -0,32475 | 0,02007 | 0,359436235 |
| min | Delaunay Triangulation Convex Hull | Vision Mental Health | -0,28311 | 0,02026 | 0,359436235 |
| min | RMS Astigmatism (µm) | Near activities | -0,24203 | 0,01876 | 0,359436235 |
| mean | Delaunay Triangulation | Near activities | -0,32204 | 0,02119 | 0,367293333 |
| max | Phase Height | Total | 0,31701 | 0,02341 | 0,383720435 |
| min | Power Vector J₀ (D) | Near activities | 0,23033 | 0,02473 | 0,388679608 |
| min | Power Vector J₀ (D) | Vision Social Functioning | 0,23042 | 0,02468 | 0,388679608 |
| min | BCVA (Dec) | Driving | 0,30569 | 0,02602 | 0,388679608 |
| max | Delaunay Triangulation | General Vision | -0,31412 | 0,02478 | 0,388679608 |
| sum | Regions Detected | Vision Dependency | 0,22031 | 0,02763 | 0,389174679 |
| mean | Regions Detected | Total | 0,30755 | 0,02813 | 0,389174679 |
| mean | Delaunay Triangulation | Vision Dependency | -0,30878 | 0,02748 | 0,389174679 |
| min | RMS Astigmatism (µm) | General Vision | -0,22818 | 0,02697 | 0,389174679 |
| sum | Density Guttae | Vision Dependency | 0,22031 | 0,02763 | 0,389174679 |
| mean | Density Guttae | Total | 0,30755 | 0,02813 | 0,389174679 |
| min | RMS Spherical (µm) | Vision Mental Health | -0,22477 | 0,02941 | 0,395984643 |
| min | Phase Height | General Health | 0,26517 | 0,03011 | 0,39702 |
| sum | RMS Astigmatism (µm) | General Health | -0,21645 | 0,03054 | 0,39702 |
| mean | Cell Density (cell/mm²) | Vision Social Functioning | 0,30516 | 0,03117 | 0,401746667 |
| mean | Delaunay Triangulation Convex Hull | Vision Dependency | -0,30083 | 0,03195 | 0,408310169 |
| mean | Delaunay Triangulation Convex Hull | General Vision | -0,29413 | 0,03617 | 0,429607328 |
| mean | Regions Detected | Ocular Pain | 0,29353 | 0,03657 | 0,429607328 |
| mean | Regions Detected | Near activities | 0,2925 | 0,03726 | 0,429607328 |
| mean | Density Guttae | Ocular Pain | 0,29353 | 0,03657 | 0,429607328 |
| mean | Density Guttae | Near activities | 0,2925 | 0,03726 | 0,429607328 |
| max | Power Vector J₄₅ (D) | Peripheral vision | -0,20904 | 0,03886 | 0,433897589 |
| min | Regions Detected | General Vision | 0,33038 | 0,03996 | 0,433897589 |
| sum | Regions Detected | Vision Role dificulties | 0,20538 | 0,04037 | 0,433897589 |
| sum | Phase Height | Vision Dependency | 0,20695 | 0,03884 | 0,433897589 |
| min | Density Guttae | General Vision | 0,33038 | 0,03996 | 0,433897589 |
| sum | Density Guttae | Vision Role dificulties | 0,20538 | 0,04037 | 0,433897589 |
| sum | RMS (mrad) | Vision Dependency | 0,20176 | 0,04411 | 0,454246531 |
| max | RMS Spherical (µm) | General Vision | -0,20052 | 0,04546 | 0,456933856 |
| min | Density Guttae (accounts/mm2) | General Health | 0,23666 | 0,05384 | 0,458704633 |
| sum | RMS (mrad) | Vision Mental Health | 0,19444 | 0,05257 | 0,458704633 |
| min | FUCH_SCALE | Driving | -0,267 | 0,05327 | 0,458704633 |
| mean | Phase Height | Total | 0,20732 | 0,04992 | 0,458704633 |
| min | Regions Detected (px2) | General Health | 0,23666 | 0,05384 | 0,458704633 |
| max | Phase Height | Vision Role dificulties | 0,27315 | 0,05246 | 0,458704633 |
| sum | Size Guttae | Vision Dependency | 0,19632 | 0,05027 | 0,458704633 |
| sum | Diameter Guttae | Vision Dependency | 0,19632 | 0,05027 | 0,458704633 |
| min | RMS Astigmatism (µm) | Total | -0,19957 | 0,0538 | 0,458704633 |
| sum | Roughness | Vision Dependency | 0,19403 | 0,05308 | 0,458704633 |
| sum | Delaunay Triangulation Convex Hull | General Health | -0,19313 | 0,05421 | 0,459262247 |
| max | Power Vector J₄₅ (D) | Vision Mental Health | -0,19188 | 0,05709 | 0,479711556 |
| min | BCVA (Dec) | Ocular Pain | 0,19078 | 0,05726 | 0,479711556 |
| min | Diameter Guttae | Vision Mental Health | 0,22985 | 0,06133 | 0,500671958 |
| min | RMS Coma (µm) | Vision Mental Health | -0,19278 | 0,06266 | 0,500671958 |
| min | Size Guttae | Vision Mental Health | 0,22985 | 0,06133 | 0,500671958 |
| sum | Delaunay Triangulation | General Health | -0,18806 | 0,06096 | 0,500671958 |
| max | Power Vector M (D) | Peripheral vision | 0,18718 | 0,06356 | 0,503826667 |
| max | Power Vector M (D) | Vision Role dificulties | 0,18629 | 0,06487 | 0,503826667 |
| max | Power Vector M (D) | Vision Dependency | 0,18524 | 0,06642 | 0,511027347 |
| sum | Roughness | General Health | -0,18387 | 0,06706 | 0,513332386 |
| sum | Roughness | Vision Mental Health | 0,18316 | 0,06815 | 0,516433166 |
| mean | Phase Height | Near activities | 0,19053 | 0,07205 | 0,540554229 |
| sum | RMS Trefoil (µm) | Ocular Pain | -0,18022 | 0,07278 | 0,541253725 |
| mean | RMS (mrad) | Peripheral vision | 0,2511 | 0,0755 | 0,543239048 |
| sum | RMS Coma (µm) | General Health | -0,17854 | 0,07552 | 0,543239048 |
| max | Cell Density (cell/mm²) | Color vision | -0,25386 | 0,07526 | 0,543239048 |
| max | Phase Height | Distance activities | 0,24705 | 0,08051 | 0,569995681 |
| max | Power Vector J₄₅ (D) | Total | -0,17474 | 0,08365 | 0,586717209 |
| mean | Delaunay Triangulation Convex Hull | Distance activities | -0,24196 | 0,08716 | 0,59205982 |
| sum | RMS Trefoil (µm) | Vision Social Functioning | -0,17233 | 0,08644 | 0,59205982 |
| max | Phase Height | Vision Role dificulties | 0,18203 | 0,08596 | 0,59205982 |
| mean | Delaunay Triangulation | Distance activities | -0,24237 | 0,0866 | 0,59205982 |
| sum | Diameter Guttae | General Health | -0,17201 | 0,08704 | 0,59205982 |
| min | Cell Density (cell/mm²) | Distance activities | -0,27311 | 0,09253 | 0,593615254 |
| max | Corneal Central Thickness (mm) | Vision Dependency | -0,18721 | 0,09215 | 0,593615254 |
| sum | Phase Height | Vision Mental Health | 0,16914 | 0,09252 | 0,593615254 |
| sum | Size Guttae | General Health | -0,17153 | 0,08794 | 0,593615254 |
| sum | Size Guttae | Vision Role dificulties | 0,16978 | 0,09127 | 0,593615254 |
| sum | Diameter Guttae | Vision Role dificulties | 0,16978 | 0,09127 | 0,593615254 |
| mean | Size Guttae | Near activities | 0,23661 | 0,09459 | 0,601863797 |
| max | Power Vector J₄₅ (D) | Distance activities | -0,16759 | 0,09731 | 0,6089093 |
| min | Corneal Central Thickness (mm) | General Health | -0,20032 | 0,09887 | 0,609084878 |
| mean | Diameter Guttae | Near activities | 0,23335 | 0,09936 | 0,609084878 |
| max | Power Vector J₄₅ (D) | Ocular Pain | -0,16579 | 0,10101 | 0,613192771 |
| sum | RMS (mrad) | Vision Role dificulties | 0,16483 | 0,10125 | 0,613192771 |
| max | Power Vector M (D) | Total | 0,16604 | 0,10049 | 0,613192771 |
| max | Power Vector J₄₅ (D) | General Health | -0,16486 | 0,10296 | 0,617385929 |
| min | Power Vector J₀ (D) | Vision Role dificulties | 0,16224 | 0,11623 | 0,656460075 |
| max | Diameter Guttae | Vision Dependency | -0,16468 | 0,12088 | 0,659505899 |
| max | Size Guttae | Vision Dependency | -0,16468 | 0,12088 | 0,659505899 |
| min | Power Vector M (D) | General Health | 0,15999 | 0,12144 | 0,659505899 |
| max | Power Vector M (D) | Driving | 0,21556 | 0,12111 | 0,659505899 |
| mean | Corneal Central Thickness (mm) | Total | -0,17238 | 0,12147 | 0,659505899 |
| max | Power Vector M (D) | Ocular Pain | 0,15557 | 0,12415 | 0,66468407 |
| mean | Corneal Central Thickness (mm) | Near activities | -0,17084 | 0,12488 | 0,66468407 |
| mean | RMS Spherical (µm) | Near activities | -0,15427 | 0,1254 | 0,66468407 |
| mean | Delaunay Triangulation | Vision Role dificulties | -0,21728 | 0,12562 | 0,66468407 |
| min | Power Vector J₄₅ (D) | Driving | -0,21615 | 0,12766 | 0,664716 |
| max | Power Vector M (D) | Distance activities | 0,1541 | 0,12777 | 0,664716 |
| max | Delaunay Triangulation | General Health | -0,15837 | 0,136 | 0,666751429 |
| mean | Regions Detected | Distance activities | 0,2117 | 0,13587 | 0,666751429 |
| max | Roughness | Vision Role dificulties | -0,16084 | 0,12992 | 0,666751429 |
| mean | Corneal Central Thickness (mm) | Distance activities | -0,16698 | 0,13377 | 0,666751429 |
| sum | Corneal Central Thickness (mm) | Peripheral vision | 0,15262 | 0,12955 | 0,666751429 |
| min | RMS Spherical (µm) | Vision Role dificulties | 0,157 | 0,13074 | 0,666751429 |
| min | RMS Spherical (µm) | Driving | -0,21226 | 0,13483 | 0,666751429 |
| min | RMS Astigmatism (µm) | Vision Mental Health | -0,15652 | 0,13192 | 0,666751429 |
| mean | Density Guttae | Distance activities | 0,2117 | 0,13587 | 0,666751429 |
| min | Density Guttae (accounts/mm2) | General Vision | 0,18266 | 0,13901 | 0,667908607 |
| min | RMS Trefoil (µm) | Near activities | -0,15337 | 0,13998 | 0,667908607 |
| max | FUCH_SCALE | Vision Social Functioning | -0,14841 | 0,14059 | 0,667908607 |
| max | Phase Height | Distance activities | 0,15678 | 0,14002 | 0,667908607 |
| mean | Phase Height | Vision Social Functioning | 0,15696 | 0,13958 | 0,667908607 |
| max | Delaunay Triangulation Convex Hull | Color vision | -0,15592 | 0,14223 | 0,667908607 |
| mean | Corneal Central Thickness (mm) | Vision Social Functioning | -0,16359 | 0,14195 | 0,667908607 |
| min | Regions Detected (px2) | General Vision | 0,18266 | 0,13901 | 0,667908607 |
| max | Phase Height | Near activities | 0,20816 | 0,1427 | 0,667908607 |
| max | Power Vector J₄₅ (D) | Near activities | -0,14727 | 0,14578 | 0,668195258 |
| mean | RMS Trefoil (µm) | General Vision | -0,14699 | 0,14447 | 0,668195258 |
| sum | Phase Height | Color vision | 0,14672 | 0,14522 | 0,668195258 |
| min | Power Vector J₄₅ (D) | Vision Role dificulties | 0,14942 | 0,14841 | 0,670066707 |
| mean | Delaunay Triangulation Convex Hull | Vision Role dificulties | -0,20555 | 0,14788 | 0,670066707 |
| max | Delaunay Triangulation | Color vision | -0,15422 | 0,1467 | 0,670066707 |
| min | Cell Density (cell/mm²) | Vision Mental Health | -0,23597 | 0,14812 | 0,670066707 |
| sum | RMS (mrad) | General Health | -0,14357 | 0,15415 | 0,671844509 |
| min | BCVA (Dec) | General Health | 0,14446 | 0,15159 | 0,671844509 |
| mean | Cell Density (cell/mm²) | General Vision | 0,20232 | 0,15882 | 0,678471841 |
| mean | Delaunay Triangulation | Peripheral vision | -0,20047 | 0,15839 | 0,678471841 |
| max | RMS Coma (µm) | General Vision | -0,14122 | 0,16107 | 0,682878315 |
| min | RMS (mrad) | Driving | -0,23191 | 0,16121 | 0,682878315 |
| sum | RMS Trefoil (µm) | Driving | 0,19122 | 0,1702 | 0,687463511 |
| mean | Diameter Guttae | Ocular Pain | -0,14642 | 0,16848 | 0,687463511 |
| min | FUCH_SCALE | Vision Mental Health | -0,13929 | 0,16692 | 0,687463511 |
| max | Phase Height | General Vision | 0,14636 | 0,16868 | 0,687463511 |
| max | Phase Height | Vision Dependency | 0,14552 | 0,17115 | 0,687463511 |
| min | RMS Spherical (µm) | Total | -0,14413 | 0,16577 | 0,687463511 |
| sum | Roughness | Vision Role dificulties | 0,14036 | 0,16366 | 0,687463511 |
| min | RMS Coma (µm) | Vision Dependency | -0,14089 | 0,17558 | 0,696775368 |
| mean | Size Guttae | Ocular Pain | -0,14432 | 0,17474 | 0,696775368 |
| mean | Delaunay Triangulation Convex Hull | Peripheral vision | -0,19123 | 0,17887 | 0,69745 |
| max | Delaunay Triangulation Convex Hull | General Health | -0,14359 | 0,17696 | 0,69745 |
| sum | RMS Coma (µm) | Color vision | -0,13266 | 0,18825 | 0,713609849 |
| mean | Size Guttae | Total | 0,18722 | 0,18834 | 0,713609849 |
| min | Roughness | Ocular Pain | -0,16189 | 0,19058 | 0,716618065 |
| max | RMS Astigmatism (µm) | Vision Role dificulties | 0,13111 | 0,1935 | 0,718198826 |
| max | Power Vector J₄₅ (D) | Vision Social Functioning | -0,12909 | 0,20287 | 0,719830494 |
| sum | Regions Detected | Color vision | 0,12923 | 0,20004 | 0,719830494 |
| mean | Diameter Guttae | Total | 0,18201 | 0,20114 | 0,719830494 |
| min | RMS Astigmatism (µm) | Vision Social Functioning | -0,13254 | 0,20286 | 0,719830494 |
| sum | Density Guttae | Color vision | 0,12923 | 0,20004 | 0,719830494 |
| min | RMS Spherical (µm) | Vision Dependency | -0,13157 | 0,20622 | 0,72001788 |
| min | Size Guttae | Color vision | -0,20658 | 0,20703 | 0,72001788 |
| min | Diameter Guttae | Color vision | -0,20658 | 0,20703 | 0,72001788 |
| min | RMS Astigmatism (µm) | Peripheral vision | -0,13002 | 0,21418 | 0,731311765 |
| min | RMS Coma (µm) | Peripheral vision | -0,12897 | 0,21541 | 0,733269255 |
| max | Delaunay Triangulation Convex Hull | General Vision | -0,12883 | 0,22623 | 0,734541935 |
| sum | Cell Density (cell/mm²) | Vision Role dificulties | 0,12224 | 0,22569 | 0,734541935 |
| mean | RMS Spherical (µm) | Distance activities | -0,1239 | 0,21939 | 0,734541935 |
| sum | Roughness | Ocular Pain | -0,1225 | 0,22469 | 0,734541935 |
| min | Delaunay Triangulation | Ocular Pain | -0,1494 | 0,22755 | 0,734786724 |
| min | Roughness | Peripheral vision | 0,20018 | 0,2282 | 0,735311111 |
| sum | Delaunay Triangulation | Color vision | 0,11981 | 0,2351 | 0,740147808 |
| max | Regions Detected | General Health | 0,16837 | 0,23759 | 0,743331369 |
| max | Density Guttae | General Health | 0,16837 | 0,23759 | 0,743331369 |
| sum | RMS (mrad) | Color vision | 0,11847 | 0,24043 | 0,746087654 |
| max | RMS Astigmatism (µm) | Driving | 0,16406 | 0,24045 | 0,746087654 |
| mean | RMS (mrad) | Peripheral vision | 0,12453 | 0,24221 | 0,747400573 |
| max | Diameter Guttae | Vision Role dificulties | -0,12381 | 0,245 | 0,750536079 |
| max | Delaunay Triangulation | General Vision | -0,12286 | 0,24866 | 0,750536079 |
| max | Size Guttae | Vision Role dificulties | -0,12381 | 0,245 | 0,750536079 |
| mean | Phase Height | Peripheral vision | 0,12316 | 0,24749 | 0,750536079 |
| min | Cell Density (cell/mm²) | Driving | -0,27798 | 0,2492 | 0,750536079 |
| max | Diameter Guttae | General Vision | -0,12148 | 0,25405 | 0,75382224 |
| max | Size Guttae | General Vision | -0,12148 | 0,25405 | 0,75382224 |
| max | FUCH_SCALE | Near activities | -0,11454 | 0,25648 | 0,755717606 |
| max | RMS (mrad) | General Vision | 0,12011 | 0,25949 | 0,755717606 |
| sum | Roughness | Color vision | 0,11443 | 0,25694 | 0,755717606 |
| sum | Delaunay Triangulation Convex Hull | Color vision | 0,11309 | 0,26261 | 0,761569 |
| sum | RMS Trefoil (µm) | Color vision | -0,11184 | 0,26792 | 0,769568305 |
| max | Delaunay Triangulation | Peripheral vision | 0,11748 | 0,27287 | 0,778303415 |
| min | Cell Density (cell/mm²) | Vision Dependency | -0,17918 | 0,27509 | 0,778303415 |
| max | Diameter Guttae | Driving | -0,15632 | 0,27835 | 0,781233198 |
| max | Size Guttae | Driving | -0,15632 | 0,27835 | 0,781233198 |
| min | Phase Height | Driving | -0,24706 | 0,28027 | 0,781233198 |
| min | Delaunay Triangulation | Driving | 0,24574 | 0,28293 | 0,786881621 |
| mean | FUCH_SCALE | Ocular Pain | 0,10764 | 0,28643 | 0,791092381 |
| mean | Density Guttae (accounts/mm2) | Peripheral vision | -0,11279 | 0,28983 | 0,794661164 |
| mean | Regions Detected (px2) | Peripheral vision | -0,11279 | 0,28983 | 0,794661164 |
| mean | Regions Detected | Peripheral vision | 0,15007 | 0,29322 | 0,798151191 |
| sum | Corneal Central Thickness (mm) | Vision Role dificulties | 0,10621 | 0,29294 | 0,798151191 |
| mean | Density Guttae | Peripheral vision | 0,15007 | 0,29322 | 0,798151191 |
| min | Delaunay Triangulation Convex Hull | Driving | 0,2398 | 0,29511 | 0,800406259 |
| sum | RMS (mrad) | Ocular Pain | -0,10535 | 0,2969 | 0,80381544 |
| min | Phase Height | Driving | -0,17144 | 0,30339 | 0,80603662 |
| mean | Cell Density (cell/mm²) | Near activities | 0,14899 | 0,30178 | 0,80603662 |
| sum | RMS Spherical (µm) | Vision Social Functioning | -0,1045 | 0,30083 | 0,80603662 |
| mean | RMS (mrad) | Vision Mental Health | 0,10999 | 0,30206 | 0,80603662 |
| min | Power Vector J₀ (D) | Vision Mental Health | 0,1054 | 0,30937 | 0,808134644 |
| min | RMS Coma (µm) | Vision Social Functioning | -0,10469 | 0,31529 | 0,808134644 |
| min | Delaunay Triangulation Convex Hull | Ocular Pain | -0,12644 | 0,30793 | 0,808134644 |
| sum | Size Guttae | Ocular Pain | -0,10127 | 0,31609 | 0,808134644 |
| sum | Diameter Guttae | Ocular Pain | -0,1017 | 0,31401 | 0,808134644 |
| min | RMS Coma (µm) | Vision Role dificulties | -0,10385 | 0,31919 | 0,810334209 |
| mean | Delaunay Triangulation | Driving | 0,1434 | 0,32048 | 0,811612685 |
| min | FUCH_SCALE | General Health | 0,09965 | 0,32392 | 0,816841739 |
| max | Delaunay Triangulation Convex Hull | Peripheral vision | 0,10365 | 0,33371 | 0,826329524 |
| min | Regions Detected | Driving | -0,2213 | 0,33502 | 0,826857872 |
| min | Density Guttae | Driving | -0,2213 | 0,33502 | 0,826857872 |
| max | Delaunay Triangulation Convex Hull | Driving | 0,13765 | 0,34046 | 0,832112934 |
| min | BCVA (Dec) | Color vision | 0,09638 | 0,34012 | 0,832112934 |
| sum | Density Guttae (accounts/mm2) | Vision Role dificulties | 0,09549 | 0,34464 | 0,835558071 |
| sum | Regions Detected (px2) | Vision Role dificulties | 0,09549 | 0,34464 | 0,835558071 |
| min | Roughness | Driving | -0,15736 | 0,3454 | 0,836056501 |
| min | Power Vector J₀ (D) | General Health | 0,09691 | 0,35017 | 0,84050654 |
| max | RMS Spherical (µm) | Ocular Pain | -0,09468 | 0,34875 | 0,84050654 |
| mean | Density Guttae (accounts/mm2) | Driving | -0,13342 | 0,35563 | 0,844551244 |
| min | RMS (mrad) | Vision Social Functioning | -0,15218 | 0,35506 | 0,844551244 |
| mean | Regions Detected (px2) | Driving | -0,13342 | 0,35563 | 0,844551244 |
| min | Power Vector J₀ (D) | General Vision | 0,0946 | 0,36183 | 0,84595293 |
| max | Corneal Central Thickness (mm) | Vision Mental Health | -0,10231 | 0,36037 | 0,84595293 |
| min | Delaunay Triangulation | Near activities | -0,11279 | 0,36347 | 0,847160371 |
| min | Roughness | Vision Mental Health | 0,11258 | 0,36438 | 0,847970741 |
| min | Delaunay Triangulation | Total | -0,11212 | 0,36637 | 0,848788571 |
| max | FUCH_SCALE | General Vision | -0,08937 | 0,37659 | 0,850146287 |
| max | Roughness | Vision Social Functioning | -0,09489 | 0,37368 | 0,850146287 |
| mean | Size Guttae | Vision Social Functioning | 0,1285 | 0,36882 | 0,850146287 |
| mean | Phase Height | Vision Mental Health | 0,09414 | 0,37748 | 0,850647045 |
| max | Roughness | Total | -0,09405 | 0,37794 | 0,850647045 |
| max | Density Guttae (accounts/mm2) | Ocular Pain | 0,09223 | 0,38729 | 0,852445557 |
| min | Diameter Guttae | Vision Social Functioning | 0,10744 | 0,38684 | 0,852445557 |
| sum | Delaunay Triangulation | Vision Role dificulties | 0,0869 | 0,38996 | 0,852445557 |
| min | Size Guttae | Vision Social Functioning | 0,10744 | 0,38684 | 0,852445557 |
| max | FUCH_SCALE | Vision Role dificulties | -0,088 | 0,38398 | 0,852445557 |
| max | Regions Detected (px2) | Ocular Pain | 0,09223 | 0,38729 | 0,852445557 |
| mean | Phase Height | Peripheral vision | 0,12362 | 0,38745 | 0,852445557 |
| mean | Diameter Guttae | Vision Social Functioning | 0,12281 | 0,39061 | 0,852445557 |
| mean | Density Guttae (accounts/mm2) | Color vision | 0,08913 | 0,4035 | 0,855470153 |
| max | Roughness | Near activities | -0,09056 | 0,39594 | 0,855470153 |
| min | Delaunay Triangulation Convex Hull | Near activities | -0,10559 | 0,39511 | 0,855470153 |
| sum | Delaunay Triangulation Convex Hull | Vision Role dificulties | 0,08423 | 0,40476 | 0,855470153 |
| mean | Regions Detected (px2) | Color vision | 0,08913 | 0,4035 | 0,855470153 |
| max | Delaunay Triangulation | Vision Social Functioning | -0,12009 | 0,40123 | 0,855470153 |
| max | Delaunay Triangulation Convex Hull | Vision Social Functioning | -0,11683 | 0,41424 | 0,856523622 |
| sum | RMS Trefoil (µm) | Peripheral vision | -0,08188 | 0,41802 | 0,856523622 |
| max | Diameter Guttae | Peripheral vision | -0,08641 | 0,41807 | 0,856523622 |
| max | Size Guttae | Peripheral vision | -0,08641 | 0,41807 | 0,856523622 |
| max | FUCH_SCALE | Total | -0,08187 | 0,41805 | 0,856523622 |
| min | Delaunay Triangulation Convex Hull | Vision Social Functioning | 0,1013 | 0,4147 | 0,856523622 |
| max | Phase Height | General Vision | 0,11533 | 0,42031 | 0,856523622 |
| min | Roughness | Vision Social Functioning | -0,13311 | 0,4192 | 0,856523622 |
| min | Density Guttae (accounts/mm2) | Total | 0,09891 | 0,42584 | 0,861881553 |
| min | Regions Detected (px2) | Total | 0,09891 | 0,42584 | 0,861881553 |
| mean | Phase Height | Vision Social Functioning | 0,11401 | 0,42568 | 0,861881553 |
| min | RMS (mrad) | General Vision | 0,12511 | 0,44793 | 0,863528421 |
| min | RMS Trefoil (µm) | Vision Role dificulties | -0,08115 | 0,43686 | 0,863528421 |
| min | Diameter Guttae | Total | 0,0927 | 0,45561 | 0,863528421 |
| min | Diameter Guttae | Near activities | 0,09357 | 0,45136 | 0,863528421 |
| min | Size Guttae | Total | 0,0927 | 0,45561 | 0,863528421 |
| min | Size Guttae | Near activities | 0,09357 | 0,45136 | 0,863528421 |
| min | Delaunay Triangulation Convex Hull | Total | -0,09505 | 0,44419 | 0,863528421 |
| mean | Size Guttae | Peripheral vision | 0,10988 | 0,44275 | 0,863528421 |
| mean | Diameter Guttae | Peripheral vision | 0,10664 | 0,45637 | 0,863528421 |
| min | Roughness | Distance activities | 0,12286 | 0,45621 | 0,863528421 |
| min | Cell Density (cell/mm²) | Total | -0,12087 | 0,46356 | 0,8738106 |
| max | Density Guttae (accounts/mm2) | Near activities | 0,07458 | 0,48482 | 0,874729231 |
| min | RMS Trefoil (µm) | Total | -0,07566 | 0,4686 | 0,874729231 |
| min | RMS Trefoil (µm) | Vision Mental Health | -0,07245 | 0,4877 | 0,874729231 |
| min | Delaunay Triangulation | Vision Social Functioning | 0,09042 | 0,4668 | 0,874729231 |
| min | Power Vector J₀ (D) | Driving | -0,10219 | 0,47548 | 0,874729231 |
| max | Roughness | General Health | -0,07677 | 0,47202 | 0,874729231 |
| min | Cell Density (cell/mm²) | Peripheral vision | -0,12052 | 0,47107 | 0,874729231 |
| max | Corneal Central Thickness (mm) | Color vision | -0,0788 | 0,48161 | 0,874729231 |
| min | RMS Spherical (µm) | Peripheral vision | 0,07311 | 0,48613 | 0,874729231 |
| max | Regions Detected (px2) | Near activities | 0,07458 | 0,48482 | 0,874729231 |
| max | RMS (mrad) | Vision Role dificulties | -0,07396 | 0,48842 | 0,874729231 |
| max | Size Guttae | Driving | -0,14287 | 0,47716 | 0,874729231 |
| max | Diameter Guttae | Driving | -0,14287 | 0,47716 | 0,874729231 |
| min | RMS Astigmatism (µm) | Vision Dependency | -0,07331 | 0,48253 | 0,874729231 |
| mean | Roughness | General Vision | 0,10224 | 0,47527 | 0,874729231 |
| min | RMS (mrad) | General Health | 0,08523 | 0,49286 | 0,877488642 |
| max | RMS (mrad) | Driving | 0,13561 | 0,50003 | 0,879270591 |
| min | FUCH_SCALE | Color vision | -0,06876 | 0,49669 | 0,879270591 |
| min | Roughness | Peripheral vision | 0,08417 | 0,50163 | 0,879270591 |
| min | Roughness | General Vision | 0,08024 | 0,51862 | 0,884505898 |
| max | FUCH_SCALE | Distance activities | -0,06487 | 0,52139 | 0,887192531 |
| sum | Delaunay Triangulation Convex Hull | Vision Dependency | 0,06462 | 0,52302 | 0,887192531 |
| max | Density Guttae (accounts/mm2) | Vision Social Functioning | -0,06384 | 0,54996 | 0,890090952 |
| min | Power Vector J₄₅ (D) | Color vision | -0,06423 | 0,53631 | 0,890090952 |
| min | Delaunay Triangulation | Vision Dependency | -0,07608 | 0,54058 | 0,890090952 |
| sum | Size Guttae | Color vision | -0,06092 | 0,54708 | 0,890090952 |
| min | FUCH_SCALE | Vision Dependency | -0,06084 | 0,54766 | 0,890090952 |
| mean | Power Vector M (D) | Vision Social Functioning | 0,06219 | 0,54083 | 0,890090952 |
| mean | Roughness | Vision Dependency | -0,06426 | 0,54735 | 0,890090952 |
| max | Regions Detected (px2) | Vision Social Functioning | -0,06384 | 0,54996 | 0,890090952 |
| sum | RMS (mrad) | Vision Social Functioning | -0,06158 | 0,54274 | 0,890090952 |
| min | Roughness | Near activities | 0,10229 | 0,53548 | 0,890090952 |
| max | Diameter Guttae | Color vision | -0,06133 | 0,56579 | 0,895499351 |
| mean | Corneal Central Thickness (mm) | General Vision | -0,06434 | 0,5658 | 0,895499351 |
| min | RMS Astigmatism (µm) | Ocular Pain | -0,05978 | 0,56708 | 0,895499351 |
| sum | Corneal Central Thickness (mm) | Ocular Pain | -0,05768 | 0,56869 | 0,897054937 |
| sum | Density Guttae (accounts/mm2) | Vision Dependency | 0,05732 | 0,57111 | 0,897118625 |
| max | RMS Trefoil (µm) | Distance activities | 0,05741 | 0,5705 | 0,897118625 |
| sum | Regions Detected (px2) | Vision Dependency | 0,05732 | 0,57111 | 0,897118625 |
| min | Diameter Guttae | General Health | -0,06945 | 0,57656 | 0,899310693 |
| min | Size Guttae | General Health | -0,06945 | 0,57656 | 0,899310693 |
| mean | RMS Spherical (µm) | Color vision | 0,05657 | 0,57612 | 0,899310693 |
| sum | RMS Spherical (µm) | General Health | -0,05601 | 0,5799 | 0,901535258 |
| min | RMS (mrad) | Ocular Pain | -0,06829 | 0,58294 | 0,902913067 |
| mean | Size Guttae | Distance activities | 0,0779 | 0,58689 | 0,905616384 |
| min | RMS (mrad) | Total | 0,08361 | 0,61282 | 0,913003992 |
| mean | Power Vector J₀ (D) | Ocular Pain | -0,05104 | 0,61587 | 0,913003992 |
| mean | RMS (mrad) | Vision Dependency | -0,05488 | 0,60744 | 0,913003992 |
| mean | Diameter Guttae | Distance activities | 0,07281 | 0,61164 | 0,913003992 |
| sum | RMS Trefoil (µm) | General Health | -0,04804 | 0,63504 | 0,922582197 |
| sum | Regions Detected | Vision Social Functioning | 0,04804 | 0,63504 | 0,922582197 |
| sum | Density Guttae | Vision Social Functioning | 0,04804 | 0,63504 | 0,922582197 |
| max | Roughness | Distance activities | -0,05014 | 0,63882 | 0,923001474 |
| mean | Corneal Central Thickness (mm) | Driving | -0,07206 | 0,64608 | 0,923001474 |
| mean | Size Guttae | General Vision | 0,06557 | 0,64757 | 0,923001474 |
| min | Roughness | Total | 0,07562 | 0,64729 | 0,923001474 |
| sum | Roughness | Driving | 0,06351 | 0,65144 | 0,926765585 |
| max | Diameter Guttae | General Vision | 0,06211 | 0,66501 | 0,932002862 |
| sum | Roughness | Color vision | -0,04261 | 0,6738 | 0,938841292 |
| min | RMS Trefoil (µm) | Vision Dependency | -0,04309 | 0,68008 | 0,941745308 |
| min | Density Guttae (accounts/mm2) | Distance activities | 0,0497 | 0,68961 | 0,942111059 |
| min | RMS (mrad) | Distance activities | 0,06692 | 0,68565 | 0,942111059 |
| min | RMS (mrad) | Near activities | 0,06587 | 0,69033 | 0,942111059 |
| min | Regions Detected (px2) | Distance activities | 0,0497 | 0,68961 | 0,942111059 |
| min | Power Vector M (D) | Color vision | -0,03946 | 0,7042 | 0,946095587 |
| max | Delaunay Triangulation | Distance activities | -0,0396 | 0,71094 | 0,946246708 |
| min | RMS (mrad) | Near activities | 0,04591 | 0,71218 | 0,947061235 |
| min | FUCH_SCALE | Peripheral vision | -0,03429 | 0,73618 | 0,954532186 |
| max | Delaunay Triangulation Convex Hull | Distance activities | -0,0371 | 0,7285 | 0,954532186 |
| sum | RMS (mrad) | Color vision | -0,0326 | 0,74748 | 0,954532186 |
| max | Diameter Guttae | Distance activities | -0,03173 | 0,76656 | 0,956710711 |
| max | Size Guttae | Distance activities | -0,03173 | 0,76656 | 0,956710711 |
| max | Power Vector M (D) | Vision Mental Health | 0,02979 | 0,76977 | 0,956710711 |
| min | Phase Height | Color vision | 0,0358 | 0,77364 | 0,956710711 |
| max | Power Vector M (D) | Near activities | 0,02792 | 0,78382 | 0,960999515 |
| min | Power Vector M (D) | General Vision | 0,02177 | 0,83411 | 0,965085439 |
| sum | RMS Astigmatism (µm) | Color vision | -0,01953 | 0,84707 | 0,965277317 |
| max | RMS (mrad) | Total | -0,01711 | 0,87285 | 0,968756941 |
| min | Power Vector J₀ (D) | Color vision | 0,01219 | 0,90668 | 0,978851645 |
| sum | RMS (mrad) | Distance activities | 0,01196 | 0,90601 | 0,978851645 |

**Supplementary material 1:** Spearman correlation between clinical parameters (Variable X) and subscales of the quality-of-life questionnaire (Variable Y). For each clinical parameter, four metrics were considered: the minimum (min), maximum (max), mean (mean), and sum (sum) of the values from both eyes of each patient. Each row represents the correlation coefficient (Rho) and corresponding p-value between a specific subscale score and a clinical variable.

Abbreviations Used in the Manuscript

| **Abbreviation** | **Description** | **Category** |
| --- | --- | --- |
| GHs | General Health score | NEI VFQ-25 |
| GVs | General Vision | NEI VFQ-25 |
| OPs | Ocular Pain | NEI VFQ-25 |
| NAs | Near Activities | NEI VFQ-25 |
| DAs | Distance Activities | NEI VFQ-25 |
| VSFs | Vision Social Functioning | NEI VFQ-25 |
| VMHs | Vision Mental Health | NEI VFQ-25 |
| VRDs | Vision Role Difficulties | NEI VFQ-25 |
| VDs | Vision Dependency | NEI VFQ-25 |
| Ds | Driving | NEI VFQ-25 |
| CVs | Color Vision | NEI VFQ-25 |
| PVs | Peripheral Vision | NEI VFQ-25 |
| RMS | Root Mean Square of high pass filtered wavefront (mrad) | HPFM Metrics |
| Regions Detected | Number of high-pass regions detected | HPFM Metrics |
| Density Guttae | Guttae density (counts/mm²) | HPFM Metrics |
| Diameter Guttae | Mean guttae diameter (µm) | HPFM Metrics |
| Size Guttae | Mean guttae size (µm²) | HPFM Metrics |
| OPDH | Optical Path Difference Height (mrad) | HPFM Metrics |
| Phase Roughness | Phase roughness (mrad) | HPFM Metrics |
| DT | Delaunay Triangulation area (px²) | HPFM Metrics |
| DTCH | Delaunay Triangulation Convex Hull (px²) | HPFM Metrics |

| Correlation model using only demographic and clinical values | | | | | |
| --- | --- | --- | --- | --- | --- |
|  | **Variables X** | **n** | **Features (n)** | **R²** | **Adj-R²** |
| Total | ['Age', 'Gender', 'Power Vector J₀ (D)', 'RMS Coma (µm)', 'BCVA (Dec)'] | 89 | 5 | 0,316 | 0,275 |
| General Health | ['Age', 'Gender', 'RMS Astigmatism (µm)'] | 100 | 3 | 0,2 | 0,175 |
| General Vision | ['Age', 'Gender', 'Power Vector J₄₅ (D)', 'BCVA (Dec)', 'RMS Spherical (µm)', 'RMS Astigmatism (µm)'] | 93 | 6 | 0,354 | 0,309 |
| Ocular Pain | ['Age', 'Gender', 'RMS Coma (µm)'] | 94 | 3 | 0,1 | 0,07 |
| Near activities | ['Age', 'Gender', 'Power Vector J₀ (D)', 'RMS Coma (µm)', 'BCVA (Dec)', 'RMS Astigmatism (µm)'] | 89 | 6 | 0,201 | 0,143 |
| Distance activities | ['Age', 'Gender', 'Power Vector J₀ (D)', 'RMS Coma (µm)', 'BCVA (Dec)', 'RMS Astigmatism (µm)'] | 89 | 6 | 0,389 | 0,344 |
| Vision Social Functioning | ['Age', 'Gender', 'Power Vector J₀ (D)', 'BCVA (Dec)'] | 95 | 4 | 0,133 | 0,095 |
| Vision Mental Health | ['Age', 'Gender', 'BCVA (Dec)', 'RMS Spherical (µm)'] | 94 | 4 | 0,233 | 0,198 |
| Vision Role dificulties | ['Age', 'Gender', 'BCVA (Dec)'] | 100 | 3 | 0,266 | 0,243 |
| Vision Dependency | ['Age', 'Gender', 'Power Vector J₄₅ (D)', 'Power Vector J₀ (D)', 'BCVA (Dec)'] | 100 | 5 | 0,136 | 0,09 |
| Driving | ['Age', 'Gender', 'RMS Coma (µm)', 'BCVA (Dec)'] | 51 | 4 | 0,313 | 0,253 |
| Color vision | ['Age', 'Gender'] | 100 | 2 | 0 | -0,02 |
| Peripheral vision | ['Age', 'Gender', 'Power Vector J₄₅ (D)', 'Power Vector J₀ (D)', 'BCVA (Dec)'] | 94 | 5 | 0,16 | 0,112 |

| Correlation model using demographic + clinical values + variables derived from advanced optical analysis (pupil =3mm) | | | | | |
| --- | --- | --- | --- | --- | --- |
|  | **Variables X** | **n** | **Features (n)** | **R²** | **Adj-R²** |
| Total | ['Age', 'Gender', 'Power Vector J₀ (D)', 'RMS Coma (µm)', 'Phase Height', 'BCVA (Dec)'] | 83 | 6 | 0,312 | 0,258 |
| General Health | ['Age', 'Gender', 'Phase Height', 'RMS Astigmatism (µm)'] | 67 | 4 | 0,222 | 0,171 |
| General Vision | ['Age', 'Gender', 'Power Vector J₄₅ (D)', 'BCVA (Dec)', 'RMS Spherical (µm)', 'RMS Astigmatism (µm)'] | 93 | 6 | 0,354 | 0,309 |
| Ocular Pain | ['Age', 'Gender', 'RMS Coma (µm)', 'Phase Height'] | 87 | 4 | 0,127 | 0,084 |
| Near activities | ['Age', 'Gender', 'Power Vector J₀ (D)', 'RMS Coma (µm)', 'BCVA (Dec)', 'RMS Astigmatism (µm)'] | 89 | 6 | 0,201 | 0,143 |
| Distance activities | ['Age', 'Gender', 'Power Vector J₀ (D)', 'RMS Coma (µm)', 'BCVA (Dec)', 'RMS Astigmatism (µm)'] | 89 | 6 | 0,389 | 0,344 |
| Vision Social Functioning | ['Age', 'Gender', 'Power Vector J₀ (D)', 'BCVA (Dec)'] | 95 | 4 | 0,133 | 0,095 |
| Vision Mental Health | ['Age', 'Gender', 'Density Guttae (accounts/mm2)', 'Delaunay Triangulation', 'Delaunay Triangulation Convex Hull', 'BCVA (Dec)', 'RMS Spherical (µm)', 'Regions Detected (px2)'] | 67 | 8 | 0,16 | 0,044 |
| Vision Role dificulties | ['Age', 'Gender', 'BCVA (Dec)'] | 100 | 3 | 0,266 | 0,243 |
| Vision Dependency | ['Age', 'Gender', 'Power Vector J₄₅ (D)', 'Power Vector J₀ (D)', 'BCVA (Dec)'] | 100 | 5 | 0,136 | 0,09 |
| Driving | ['Age', 'Gender', 'RMS Coma (µm)', 'BCVA (Dec)'] | 51 | 4 | 0,313 | 0,253 |
| Color vision | ['Age', 'Gender'] | 100 | 2 | 0 | -0,02 |
| Peripheral vision | ['Age', 'Gender', 'Power Vector J₄₅ (D)', 'Power Vector J₀ (D)', 'BCVA (Dec)'] | 94 | 5 | 0,16 | 0,112 |

| LME and OLS comparison | | | | | |  |  |  |
| --- | --- | --- | --- | --- | --- | --- | --- | --- |
|  | **Variables X (used)** | **n** | **Clusters (patients)** | **Features (n)** | **OLS Adj-R² (table)** | **LME R² (marginal)** | **LME R² (conditional)** | **Δ (LME_m - OLS_adj)** |
| Total | ['Age', 'SEX', 'SUB_J0', 'TD_RMS_COMA', 'BCVA'] | 89 | 89 | 5 | 0,275 | 0,303 | 0,652 | 0,028 |
| General Health | ['Age', 'SEX', 'TD_RMS_ASTIG'] | 100 | 100 | 3 | 0,175 | 0,195 | 0,598 | 0,02 |
| General Vision | ['Age', 'SEX', 'SUB_J45', 'BCVA', 'TD_RMS_SPH', 'TD_RMS_ASTIG'] | 93 | 93 | 6 | 0,309 | 0,339 | 0,67 | 0,03 |
| Ocular Pain | ['Age', 'SEX', 'TD_RMS_COMA'] | 94 | 94 | 3 | 0,07 | 0,097 | 0,549 | 0,027 |
| Near activities | ['Age', 'SEX', 'SUB_J0', 'TD_RMS_COMA', 'BCVA', 'TD_RMS_ASTIG'] | 89 | 89 | 6 | 0,143 | 0,19 | 0,595 | 0,047 |
| Distance activities | ['Age', 'SEX', 'SUB_J0', 'TD_RMS_COMA', 'BCVA', 'TD_RMS_ASTIG'] | 89 | 89 | 6 | 0,344 | 0,372 | 0,686 | 0,028 |
| Vision Social Functioning | ['Age', 'SEX', 'SUB_J0', 'BCVA'] | 95 | 95 | 4 | 0,095 | 0,129 | 0,564 | 0,034 |
| Vision Mental Health | ['Age', 'SEX', 'BCVA', 'TD_RMS_SPH'] | 94 | 94 | 4 | 0,198 | 0,225 | 0,613 | 0,027 |
| Vision Role dificulties | ['Age', 'SEX', 'BCVA'] | 100 | 100 | 3 | 0,243 | 0,26 | 0,63 | 0,017 |
| Vision Dependency | ['Age', 'SEX', 'SUB_J45', 'SUB_J0', 'BCVA'] | 100 | 100 | 5 | 0,09 | 0,13 | 0,565 | 0,04 |
| Driving | ['Age', 'SEX', 'TD_RMS_COMA', 'BCVA'] | 51 | 51 | 4 | 0,253 | 0,295 | 0,648 | 0,042 |
| Color vision | ['Age', 'SEX'] | 100 | 100 | 2 | -0,02 | 0 | 0,5 | 0,02 |
| Peripheral vision | ['Age', 'SEX', 'SUB_J45', 'SUB_J0', 'BCVA'] | 94 | 94 | 5 | 0,112 | 0,152 | 0,576 | 0,04 |

**Supplementary Material 2** : Regression models of clinical and optical predictors of vision-related quality of life. This file includes three tables, each summarizing the results of multiple linear regression analyses: Upper table: models constructed using only demographic and clinical variables. Second table: All models included here use optical parameters derived from 3-mm pupil analysis. Metrics from 5-mm pupil size were excluded due to incomplete data and lack of added value.

For each subscale of the quality-of-life questionnaire, the table lists the variables included in the model (X variables), the number of subjects (n), the number of features used (Features (n)), the coefficient of determination (R²), and the adjusted R². This allows assessment of how well each combination of predictors explains variability in patient-reported outcomes.
